# Supplementary material
Source: PubMed Central journal article supplement (PMC1851599)

**A**

**Test Dataset Classifier Performance  
(10-class classifiers, ALL/AML merged)**

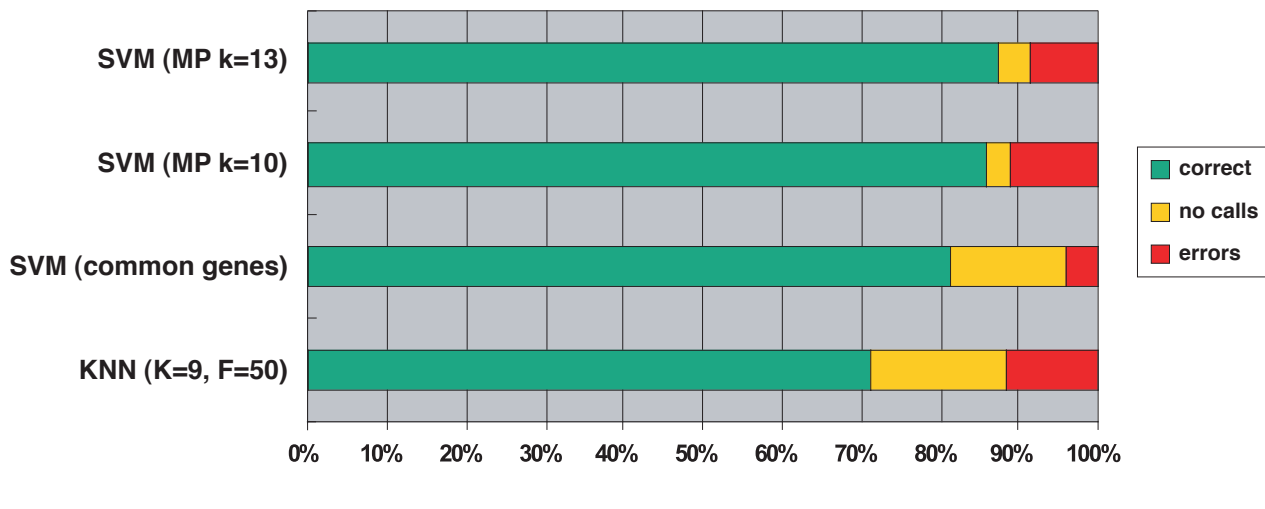**B**

**Test Dataset Classifier Performance  
(5-class classifiers, ALL/AML separated)**

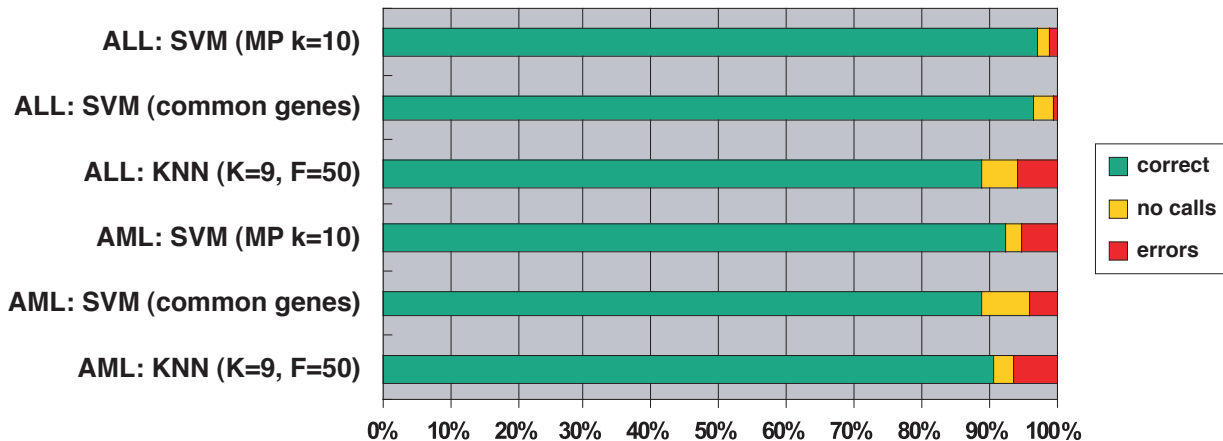

Supplement: pnas_0701068104_5.pdf [file pnas_0701068104_5.pdf]
