# Supplementary material
Source: PubMed Central journal article supplement (PMC1851599)
Supplement: pnas_0701068104_7.pdf [file pnas_0701068104_7.pdf]

**Table 5: Lung Cancer: Gene Sets Enriched in Metagene Factor 1**

| No. | Gene set                         | Description                                                                                                                                                                                               | ES    | P     | FDR   |
|-----|----------------------------------|-----------------------------------------------------------------------------------------------------------------------------------------------------------------------------------------------------------|-------|-------|-------|
| 1   | TARTE_PLASMA_BLAISTIC            | Genes overexpressed in mature plasma cells isolated from tonsils (TPCs) and mature plasma cells isolated from bone marrow (BMPCs) as compared to polyclonal plasmablastic cells (PPCs)                    | 2.576 | 0.002 | 0.012 |
| 2   | BASSO_REGULATORY_HUBS_SET        | Genes which comprise the top 1% of highly interconnected genes (major hubs) that account for most of the interactions in the reconstructed regulatory networks from expression profiles in human B cells. | 2.350 | 0.002 | 0.067 |
| 3   | MRNA_PROCESSING_REACTOME         | mRNA processing                                                                                                                                                                                           | 2.167 | 0.002 | 0.175 |
| 4   | PENG_Glutamine_DOWN              | Genes downregulated in response to glutamine starvation                                                                                                                                                   | 2.130 | 0.004 | 0.174 |
| 5   | 5CANCER_UNDIFFERENTIATED_META_UP | Sixty-nine genes commonly upregulated in undifferentiated cancer relative to well-differentiated cancer, from a meta-analysis of the OncoMine gene expression                                             | 2.090 | 0.002 | 0.195 |
| 6   | HUMAN_MITODB_6_2002              | CURT: Expert curation                                                                                                                                                                                     | 2.066 | 0.008 | 0.188 |
| 7   | BRCA1_IRRADIATED_UP              | Up-regulated in germline-mutant BRCA1 tumor cells compared to non-BRCA1 control tumors, following 15 Gy irradiation                                                                                       | 2.066 | 0.004 | 0.161 |
| 8   | HDACI_COLON_BUT16HRS_DN          | Downregulated by butyrate at 16 hrs in SW260 colon carcinoma cells                                                                                                                                        | 2.037 | 0.002 | 0.173 |
| 9   | MITOCHONDRIA                     | Mitochondrial genes                                                                                                                                                                                       | 2.014 | 0.016 | 0.180 |
| 10  | VENTRICLES_UP                    | Upregulated in the ventricles of healthy hearts, compared to atria                                                                                                                                        | 1.979 | 0.004 | 0.196 |
| 11  | HDACI_COLON_BUT_DN               | Downregulated by butyrate at any timepoint up to 48 hrs in SW260 colon carcinoma                                                                                                                          | 1.967 | 0.008 | 0.199 |
| 12  | GOLDRATH_HP                      | Genes upregulated in CD8+ T cells undergoing homeostatic proliferation (HP) versus naive CD8+ T cell populations; these genes are not upregulated versus effector or                                      | 1.955 | 0.004 | 0.201 |
| 13  | ALZHEIMERS_DISEASE_DN            | Downregulated in correlation with overt Alzheimer's Disease, in the CA1 region of the hippocampus                                                                                                         | 1.858 | 0.029 | 0.324 |
| 14  | ELECTRON_TRANSPORT_CHAIN         | Electron transport chain                                                                                                                                                                                  | 1.834 | 0.065 | 0.344 |
| 15  | PENG_RAPAMYCIN_DOWN              | Genes downregulated in response to rapamycin                                                                                                                                                              | 1.828 | 0.040 | 0.331 |
| 16  | BHATTACHARYA_ESC_UP              | Genes upregulated in undifferentiated human embryonic stem cells                                                                                                                                          | 1.797 | 0.012 | 0.372 |
| 17  | PENG_LEUCINE_DOWN                | Genes downregulated in response to leucine starvation                                                                                                                                                     | 1.780 | 0.043 | 0.381 |
| 18  | MYC_HUVEC_SAGE_ARRAY_UP          | Genes up-regulated by MYC in HUVEC (umbilical vein endothelial cell)                                                                                                                                      | 1.777 | 0.023 | 0.366 |
| 19  | VOXPPOS                          | Oxidative Phosphorylation                                                                                                                                                                                 | 1.719 | 0.082 | 0.464 |
| 20  | BRCA1_OVEREXP_DN                 | Downregulated by induction of exogenous BRCA1 in EcR-293 cells                                                                                                                                            | 1.683 | 0.021 | 0.523 |
