# Supplementary material
Source: PubMed Central journal article supplement (PMC1851599)

A  
Before Projection

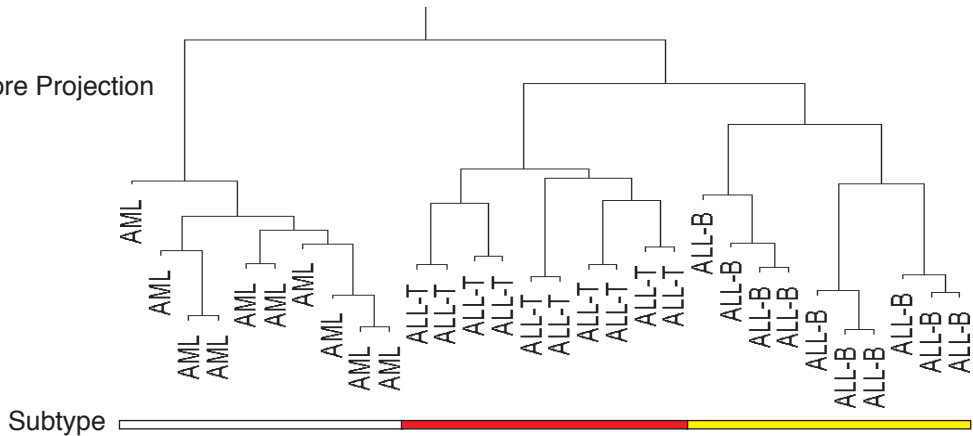

B  
After Projection

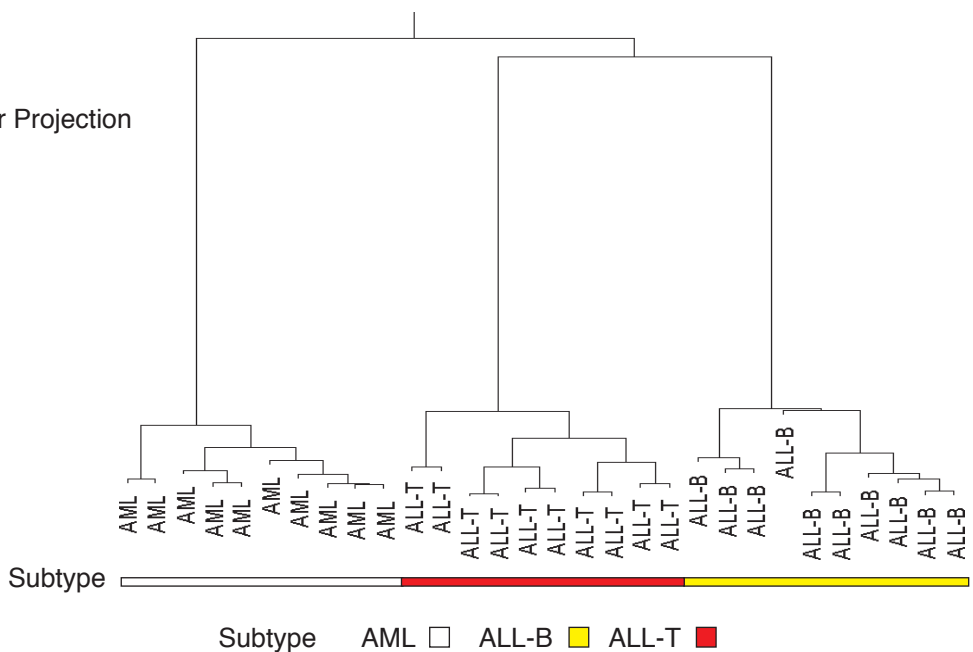

Supplement: pnas_0701068104_1.pdf [file pnas_0701068104_1.pdf]

**A**

After Projection

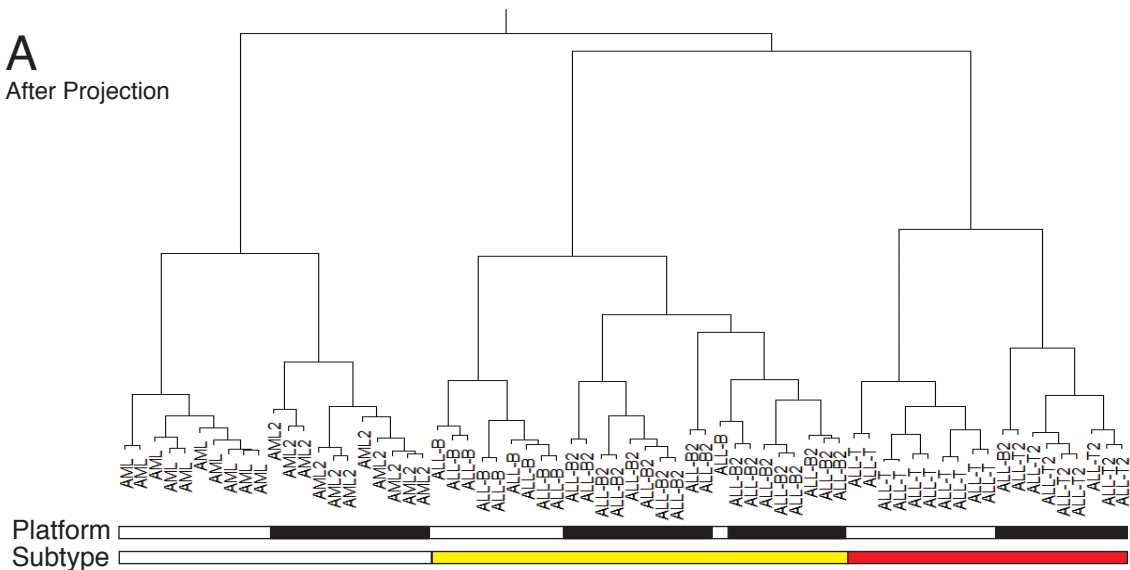**B**

Before Projection

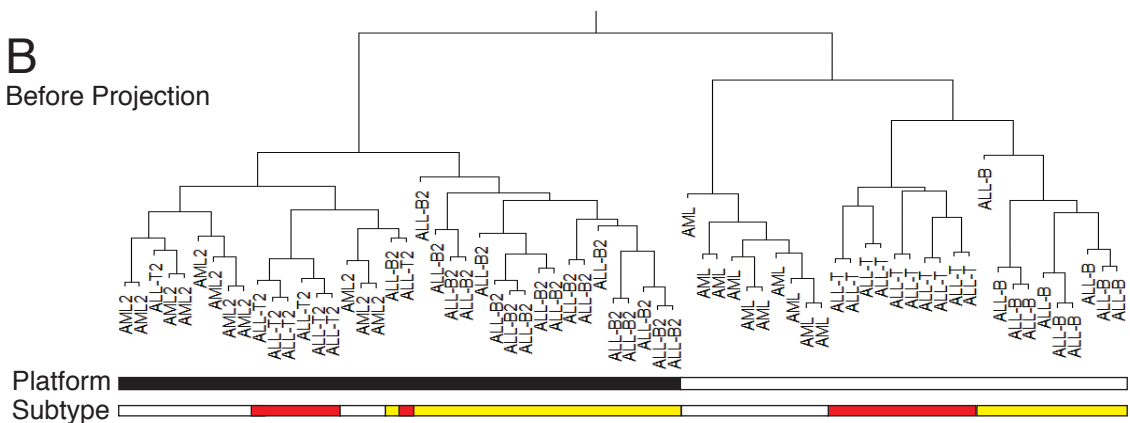

Platform: Affy U-133  Affy HU6800  Subtype: AML  ALL-B  ALL-T

Supplement: pnas_0701068104_2.pdf [file pnas_0701068104_2.pdf]

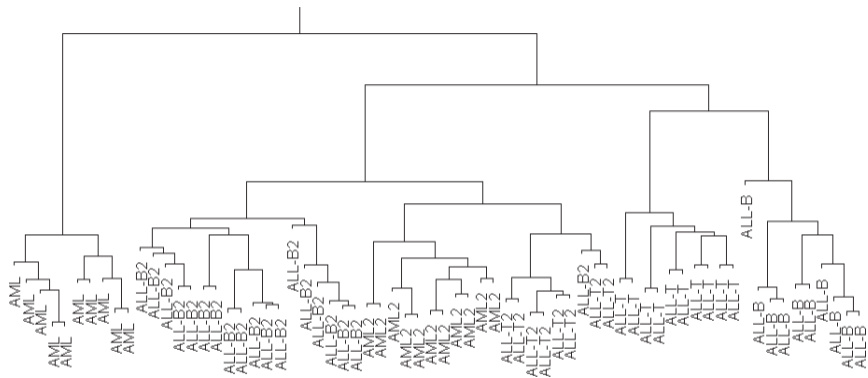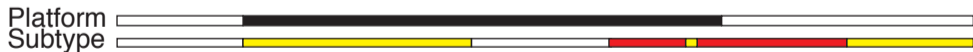

Platform

Affy U-133

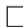

Affy HU6800

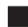

Subtype

AML

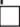

ALL-B

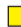

ALL-T

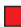

Supplement: pnas_0701068104_3.pdf [file pnas_0701068104_3.pdf]

**Cophenetic Coefficient**

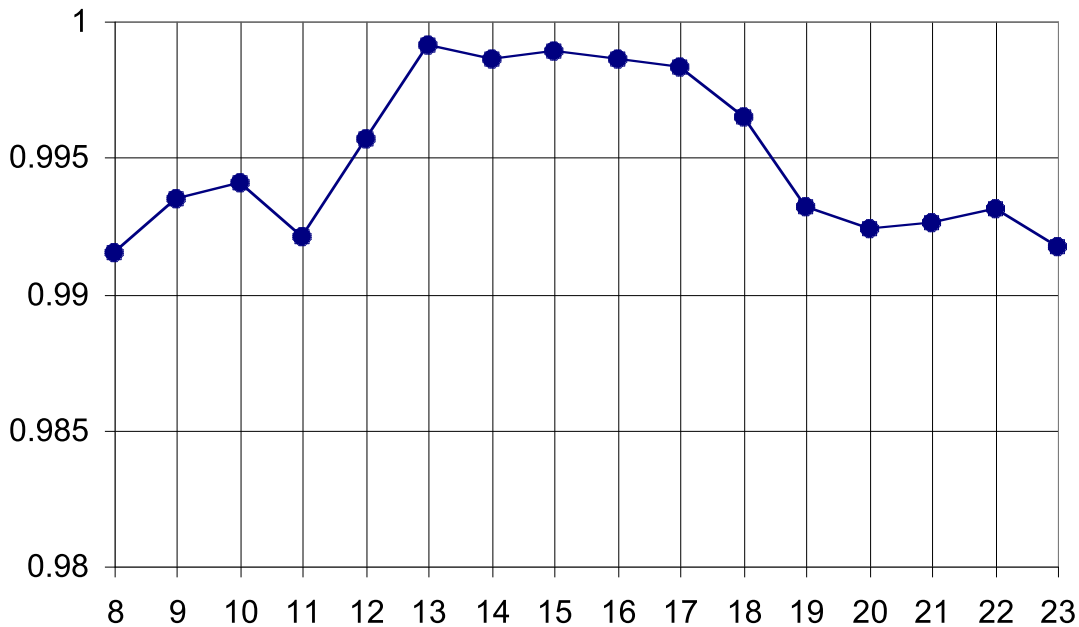

**k**

Supplement: pnas_0701068104_4.pdf [file pnas_0701068104_4.pdf]

**Cophenetic Coefficient**

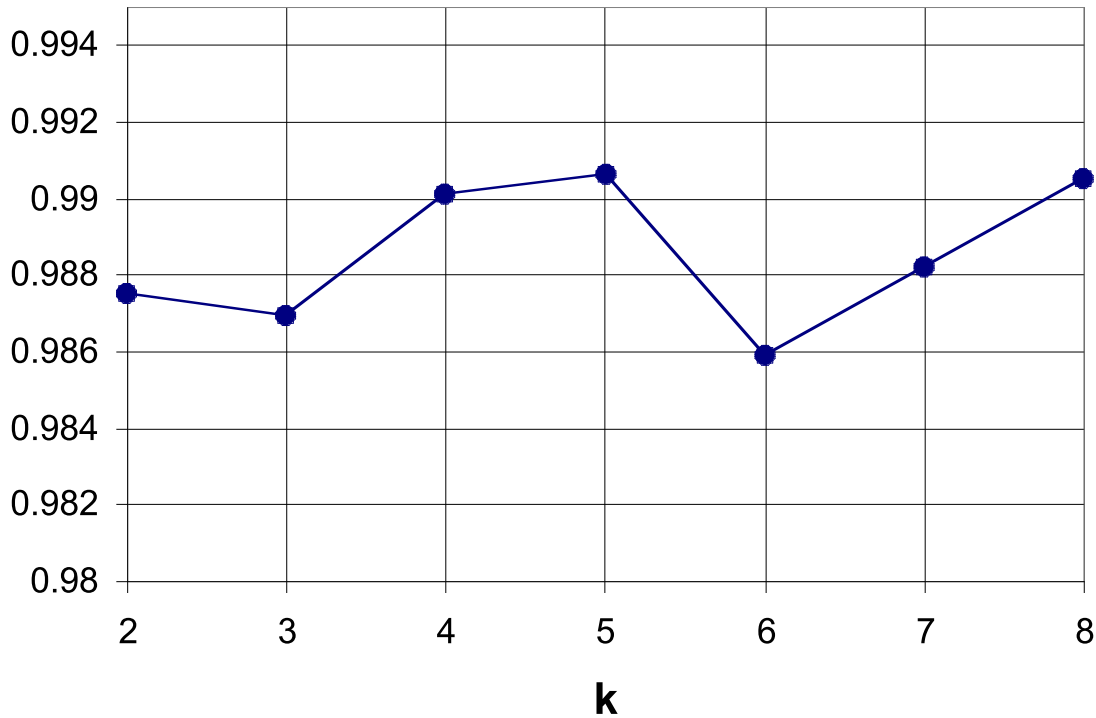

Supplement: pnas_0701068104_6.pdf [file pnas_0701068104_6.pdf]
